# Supplementary material
Source: PubMed Central journal article supplement (PMC9133117)
Supplement: NIHMS1792696-supplement-1.pdf [file NIHMS1792696-supplement-1.pdf]

# Supplementary Material

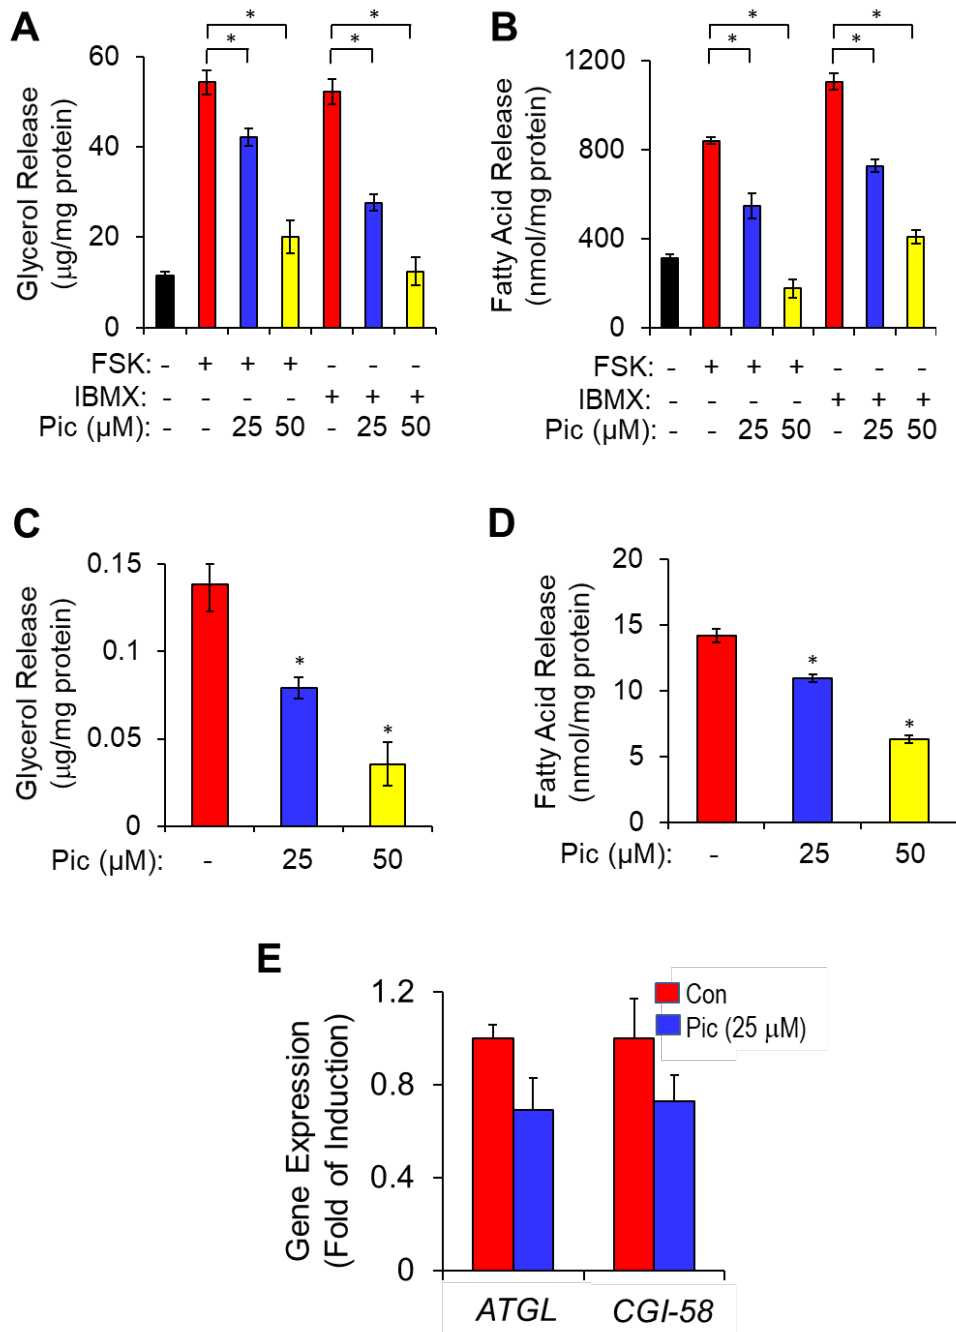

**Fig S1. Piceatannol inhibits both basal and stimulated lipolysis in adipocytes.** Differentiated 3T3-L1 adipocytes (**A**, **B**, **E**) or gonadal fat pads collected from six-week-old C57BL/6 mice (**C**, **D**) were treated with piceatannol at the indicated concentration in the presence or absence of forskolin (FSK, 24  $\mu\text{M}$ ), IBMX (100  $\mu\text{M}$ ) and/or isoproterenol (*iso*, 10  $\mu\text{M}$ ) in DMEM containing 1% fatty acid-free bovine serum albumin for 90 min. The medium was collected to measure the released glycerol (**A**, **C**) and free fatty acids (**B**, **D**). (**E**) total RNA isolated from piceatannol-treated cells were subjected to quantitative RT-PCR for the analysis of *ATGL* and *CGI-58*. Data are presented as means  $\pm$  SEM. (n=3-4, \*, p < 0.05).
